# Supplementary material for: Evaluation of transplacental transfer of mRNA vaccine products and functional antibodies during pregnancy and early infancy
Source: PubMed Central journal article supplement (PMC8687466; doi:10.21203/rs.3.rs-1150427/v1), 2021-12-15
Supplement: ed822670c7572592a0df3e9d.pdf [file ed822670c7572592a0df3e9d.pdf]

## Supplementary Material

|           | Page |
|-----------|------|
| Table S1  | 2    |
| Table S2  | 2    |
| Table S3  | 3    |
| Figure S1 | 4    |

**Table S1: Maternal Demographics**

| Study ID | Gestational Age at Delivery | Infant Sex | Vaccine Type | Gestational Age at Dose 1 | Maternal Age |
|----------|-----------------------------|------------|--------------|---------------------------|--------------|
| 11012    | 37.71                       | Female     | Moderna      | 26.572                    | 36           |
| 11018    | 37.43                       | Female     | Moderna      | 36                        | 30           |
| 11026    | 37.57                       | Female     | Moderna      | 31.858                    | 33           |
| 11033    | 20.43                       | Male       | Pfizer       | 13.143                    | 29           |
| 11036    | 38.71                       | Male       | Moderna      | 31                        | 40           |
| 11038    | 39.86                       | Female     | Moderna      | 31.286                    | 35           |
| 11040    | 39.29                       | Male       | Moderna      | 33.715                    | 35           |
| 11045    | 38.86                       | Female     | Pfizer       | 30.572                    | 36           |
| 11047    | 39.29                       | Male       | Moderna      | 31.572                    | 36           |
| 11048    | 39.14                       | Male       | Pfizer       | 25.286                    | 33           |
| 11058    | 40.14                       | Female     | Moderna      | 33.858                    | 34           |
| 11059    | 40.14                       | Male       | Moderna      | 30.429                    | 36           |
| 11062    | 40.29                       | Male       | Moderna      | 30.715                    | 36           |
| 11063    | 37.57                       | Female     | Moderna      | 25                        | 29           |
| 11085    | 41.14                       | Male       | Pfizer       | 40.286                    | 34           |
| 11091    | 39.57                       | Female     | Pfizer       | 28.143                    | 36           |
| 11123    | 39.14                       | Male       | Pfizer       | 35                        | 38           |
| 11126    | 39.14                       | Female     | Pfizer       | 36                        | 39           |
| 11128    | 39.71                       | Male       | Pfizer       | 37                        | 33           |
| 11137    | 40.57                       | Male       | Moderna      | 37                        | 33           |

**Table S2: Serial dilution of vaccine cDNA**

| pg Vaccine cDNA | Moderna Ct | Pfizer Ct |
|-----------------|------------|-----------|
| 10000.00        | 6.578      | 6.696     |
| 3333.33         | 8.247      | 12.266    |
| 1111.11         | 11.403     | 12.804    |
| 370.37          | 12.799     | 15.355    |
| 123.46          | 14.327     | 16.314    |
| 41.15           | 16.217     | 19.397    |
| 13.72           | 18.430     | 19.727    |
| 4.57            | 20.503     | 21.579    |
| 1.52            | 23.315     | 24.646    |
| 0.51            | 23.337     | 23.998    |
| 0.17            | 24.259     | 26.110    |
| 0.06            | 25.510     | 27.840    |

\*Sensitivity to 1.5 pg/uL

**Table S3: Spike protein western blot and vaccine mRNA PCR results**

| Participant | Spike Protein Detection<br>(Western blot) |                   |            | Spike mRNA Detection<br>(qRT-PCR) |                   |            |
|-------------|-------------------------------------------|-------------------|------------|-----------------------------------|-------------------|------------|
|             | Placenta                                  | Maternal<br>Blood | Cord Blood | Placenta                          | Maternal<br>Blood | Cord Blood |
| 11012       | Negative                                  | Negative          | Negative   | Negative                          | Negative          | Negative   |
| 11018       | Negative                                  | Negative          | Negative   | Negative                          | Negative          | Negative   |
| 11026       | Negative                                  | Negative          | Negative   | Negative                          | Negative          | Negative   |
| 11033       | Negative                                  | Negative          | Negative   | Negative                          | Negative          | Negative   |
| 11036       | Negative                                  | Negative          | Negative   | Negative                          | Negative          | Negative   |
| 11038       | Negative                                  | Negative          | Negative   | Negative                          | Negative          | Negative   |
| 11040       | -                                         | Negative          | Negative   | -                                 | Negative          | Negative   |
| 11045       | Negative                                  | Negative          | Negative   | Negative                          | Negative          | Negative   |
| 11047       | -                                         | Negative          | Negative   | -                                 | Negative          | Negative   |
| 11048       | Negative                                  | Negative          | Negative   | Negative                          | Negative          | Negative   |
| 11058       | Negative                                  | Negative          | Negative   | Negative                          | Negative          | Negative   |
| 11059       | -                                         | Negative          | Negative   | -                                 | Negative          | Negative   |
| 11062       | Negative                                  | Negative          | -          | Negative                          | Negative          | -          |
| 11063       | Negative                                  | Negative          | Negative   | Negative                          | Negative          | Negative   |
| 11085       | -                                         | -                 | -          | -                                 | -                 | -          |
| 11091       | Negative                                  | Negative          | Negative   | Negative                          | Negative          | Negative   |
| 11123       | Negative                                  | Negative          | Negative   | Negative                          | Negative          | Negative   |
| 11126       | Negative                                  | Negative          | Negative   | Negative                          | Negative          | Negative   |
| 11128       | Negative                                  | Negative          | Negative   | Negative                          | Negative          | Negative   |
| 11137       | Negative                                  | Negative          | -          | Negative                          | Negative          | Negative   |

- Missing sample

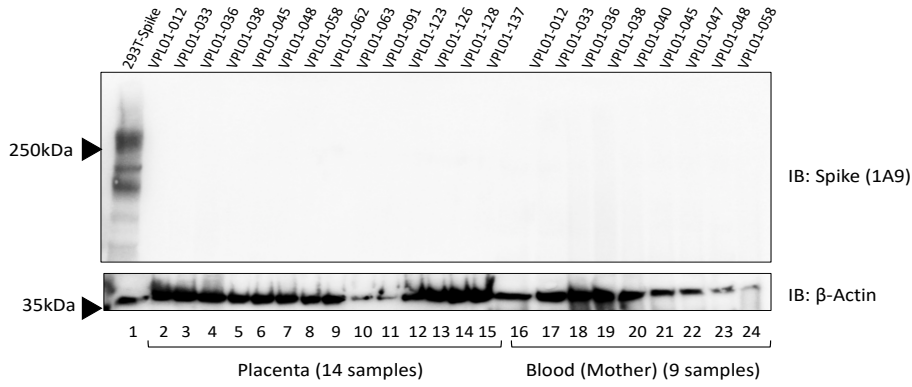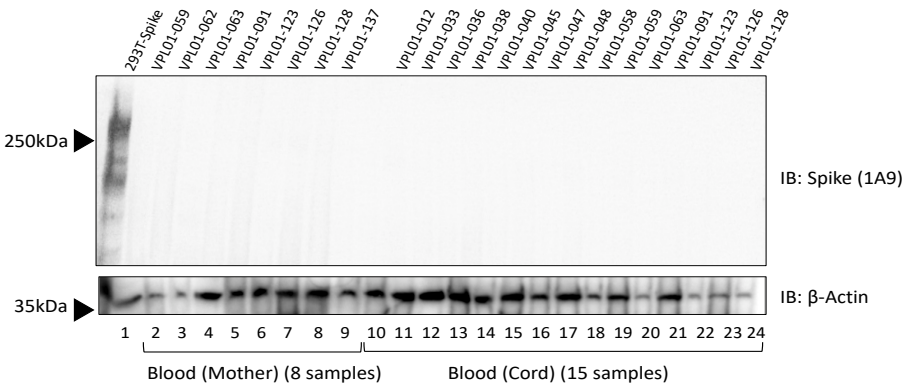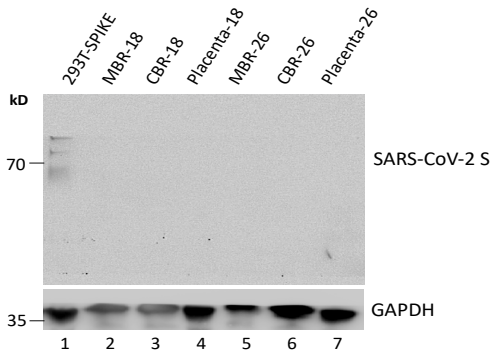

**Supplementary Figure 1: Spike protein Western blot**

Western blot of maternal blood at delivery, placenta tissue, and cord blood compared to Spike protein positive control
